# Supplementary material for: Chromothripsis is a common mechanism driving genomic rearrangements in primary and metastatic colorectal cancer
Source: Springer Nature journal article supplement (doi:10.1186/gb-2011-12-10-r103), 2011-10-19
Supplement: Additional file 1 [file gb-2011-12-10-r103-s1.pdf]

## Additional data file 1

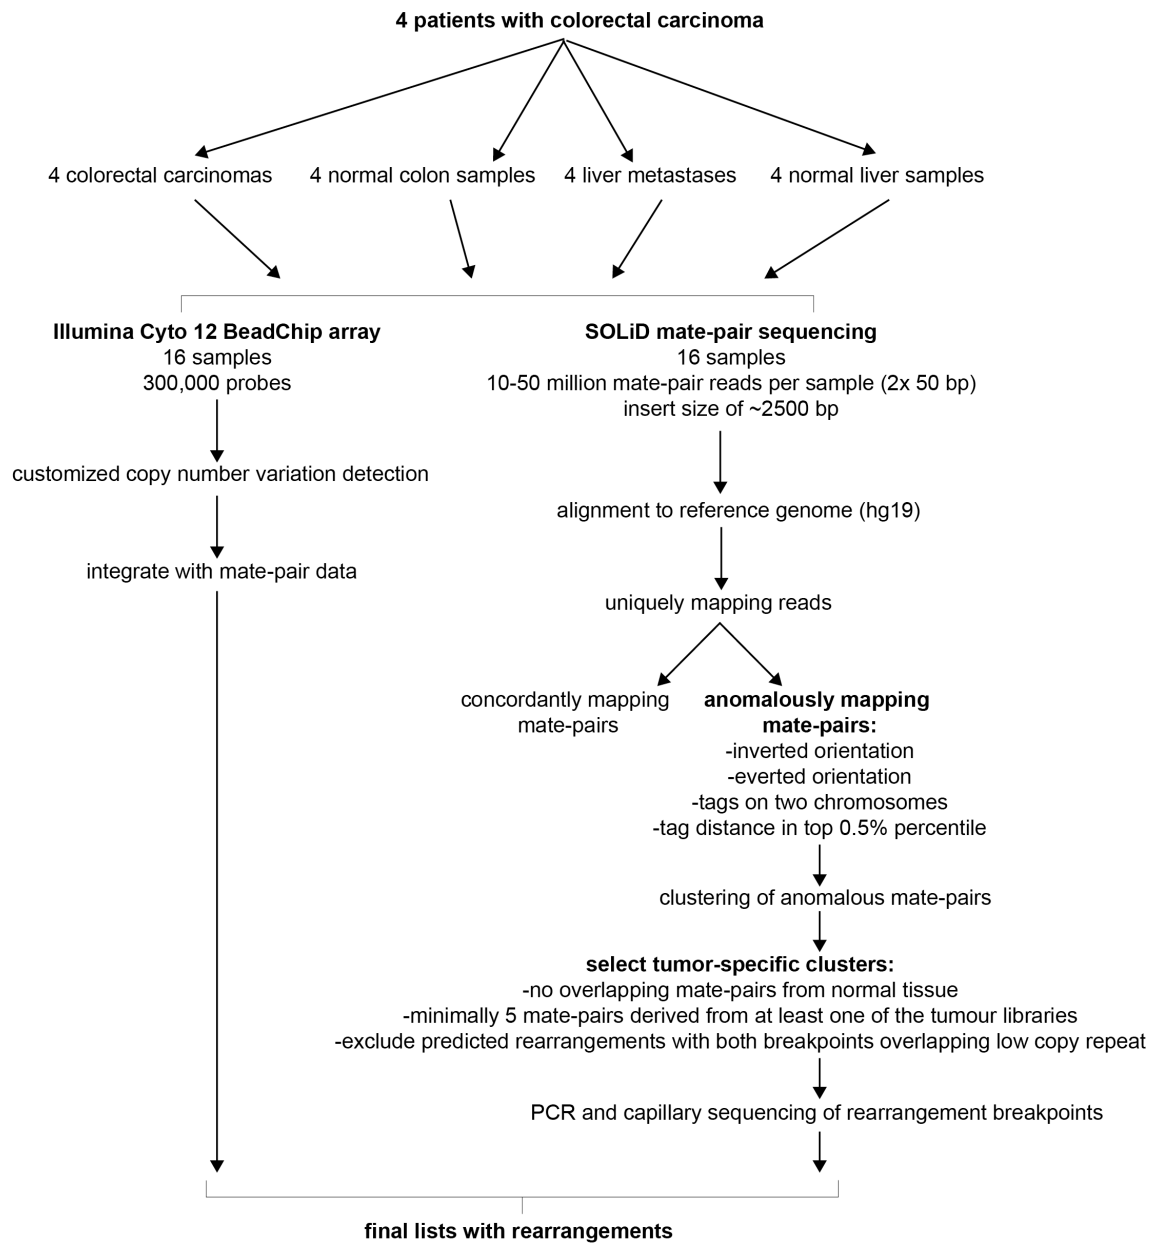

Flow diagram of the procedure for detecting tumor specific rearrangements and copy number changes.
