# Supplementary material for: Chromothripsis is a common mechanism driving genomic rearrangements in primary and metastatic colorectal cancer
Source: Springer Nature journal article supplement (doi:10.1186/gb-2011-12-10-r103), 2011-10-19
Supplement: Additional file 12 [file gb-2011-12-10-r103-s12.pdf]

Additional data file 12

**A**

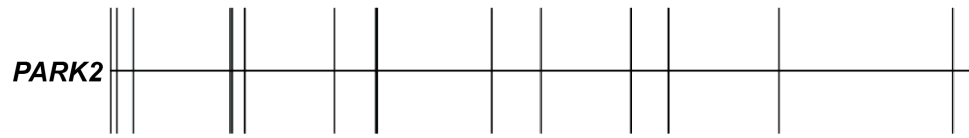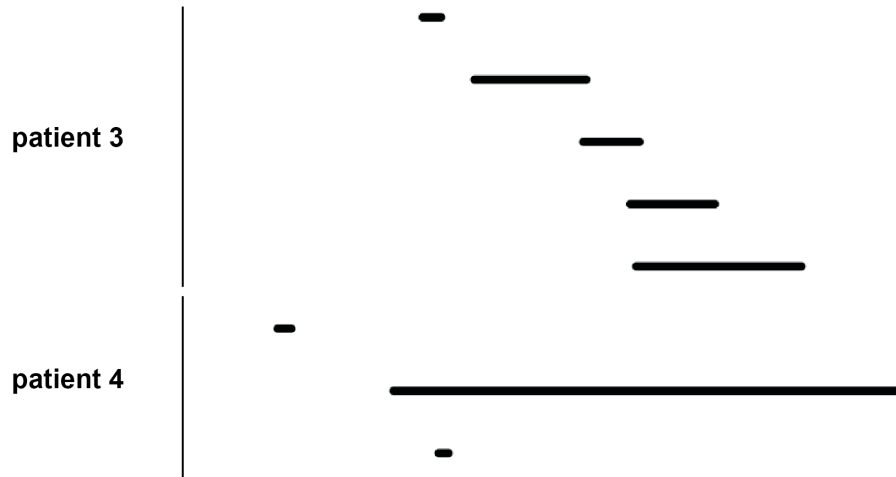

**B**

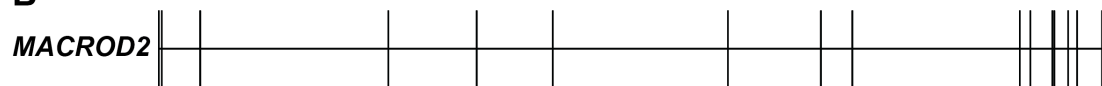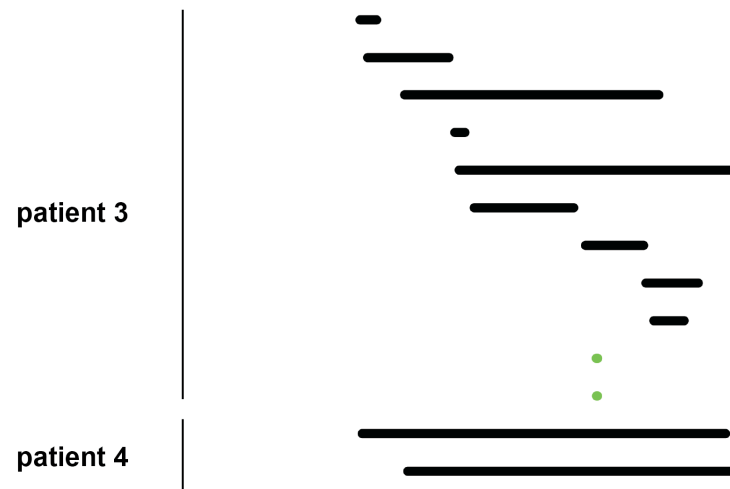

Hotspots of rearrangements in *PARK2* and *MACROD2*. (A) Recurrent deletions in *PARK2* in patients 3 and 4. (B) Recurrent deletions and rearrangement breakpoints in *MACROD2* in patient 3 and 4. Green spots indicate rearrangement breakpoints and black lines indicate deletions. Exons are depicted as vertical bars.
